# Supplementary material for: Aurora kinase targeting in lung cancer reduces KRAS-induced transformation
Source: PubMed Central journal article supplement (PMC4739397; doi:10.1186/s12943-016-0494-6), 2016-02-03

FIGURE S3

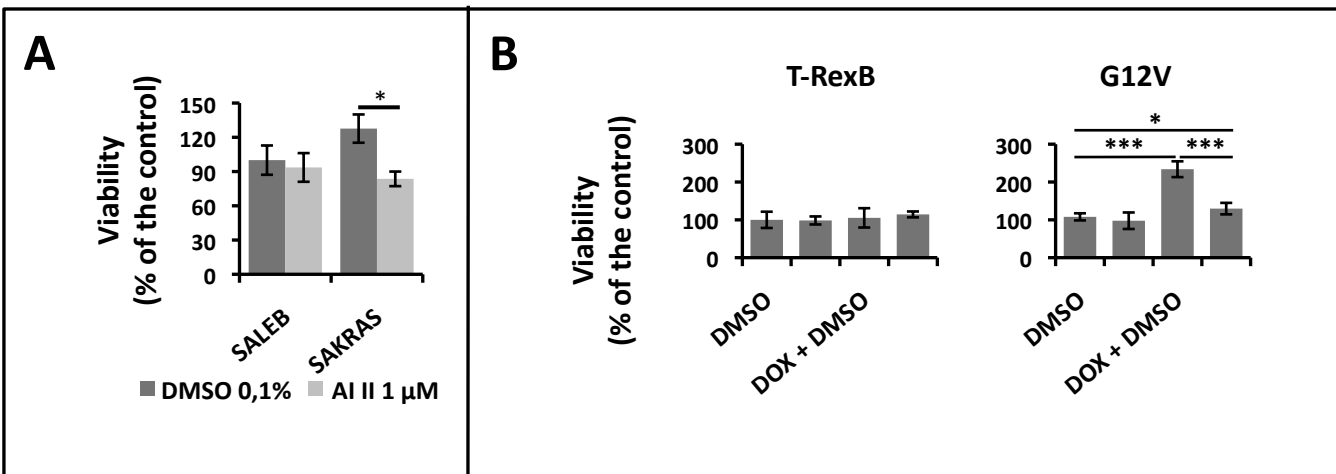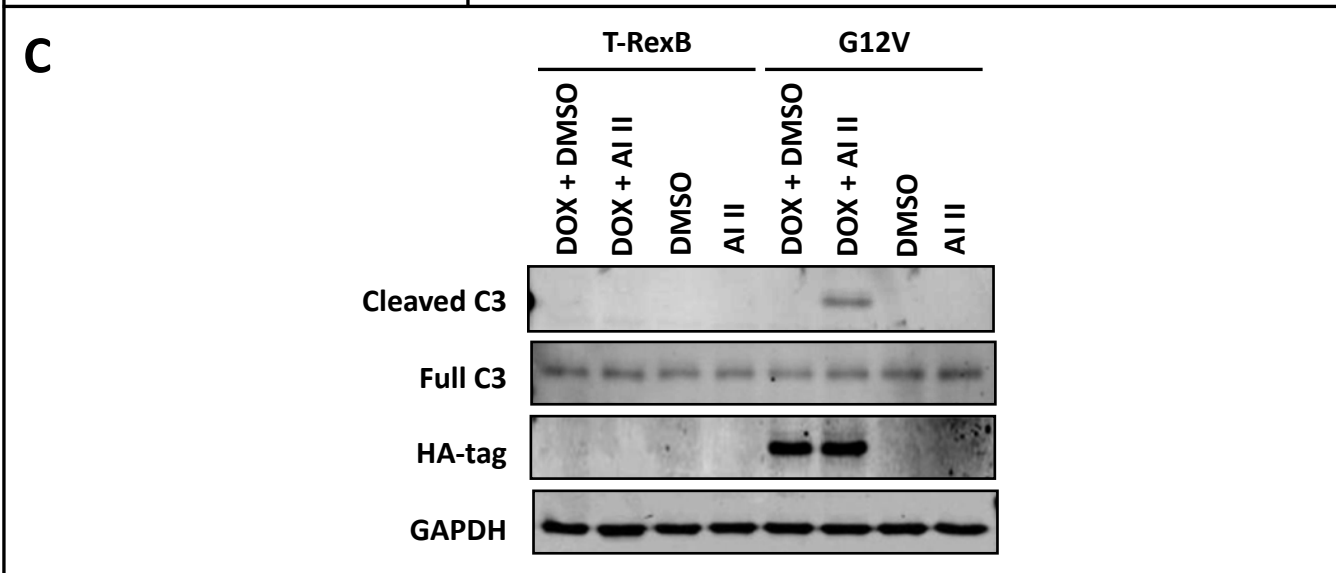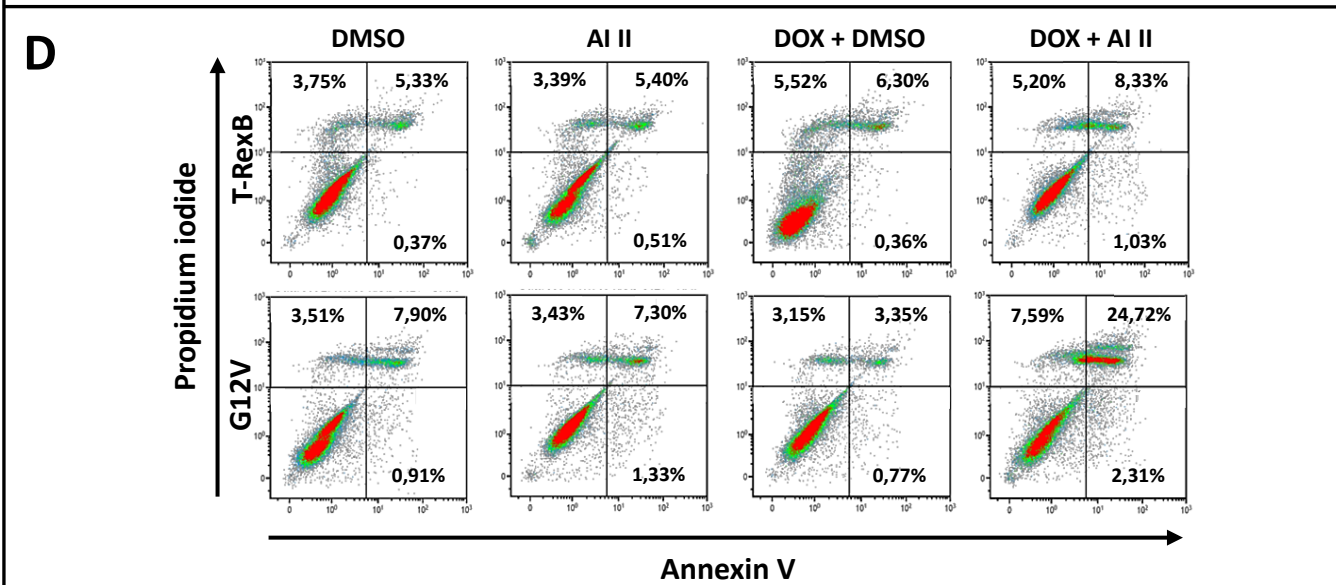

Supplement: 12943_2016_494_MOESM4_ESM.pdf [file 12943_2016_494_MOESM4_ESM.pdf]
